# Supplementary material for: Characteristics and outcome of critically ill patients with systemic rheumatic diseases referred to the intensive care unit
Source: PubMed Central journal article supplement — RMD Open. 2023 Nov 29;9(4):e003287. doi: 10.1136/rmdopen-2023-003287 (PMC10689389; doi:10.1136/rmdopen-2023-003287), 2023-11-29
Supplement: rmdopen-2023-003287supp001.pdf [file rmdopen-2023-003287supp001.pdf]

## **Supplementary Material**

### **Characteristics and Outcome of Critically Ill Patients with Systemic Rheumatic Diseases Referred to the Intensive Care Unit**

Mathias Schneeweiss-Gleixner, MD, PhD<sup>1</sup>; Caroline Hillebrand, MD<sup>2</sup>; Stephanie Jaksits, MD<sup>2</sup>; Jonathan Fries, MSc<sup>3</sup>; Michael Zauner, MSc<sup>2</sup>; Gottfried Heinz, MD<sup>4</sup>; Gürkan Sengölge, MD<sup>5</sup>; Thomas Staudinger, MD<sup>6</sup>; Christian Zauner, MD<sup>1</sup>; Daniel Aletaha, MD<sup>2</sup>; Klaus P. Machold, MD<sup>2</sup>; Peter Schellongowski, MD<sup>6</sup>; Manuel Bécède, MD<sup>2,7,8</sup>

**Supplemental Table 1: Distinctive reasons for ICU admission**

| Variable                                        | SRD-related (n=56) | Co-existent SRD (n=136) |
|-------------------------------------------------|--------------------|-------------------------|
| <b>Shock, No. (%)</b>                           | 9 (16.1)           | 37 (27.2)               |
| <b>Hyperinflammatory, No. (%)</b>               | 7 (12.5)           | 0 (0)                   |
| <b>Hemorrhagic, No. (%)</b>                     | 2 (3.6)            | 1 (0.7)                 |
| <b>Septic, No. (%)</b>                          | 0 (0)              | 26 (19.1)               |
| <b>Cardiogenic, No. (%)</b>                     | 0 (0)              | 5 (3.7)                 |
| <b>Hypovolemic, No. (%)</b>                     | 0 (0)              | 4 (2.9)                 |
| <b>Anaphylactic, No. (%)</b>                    | 0 (0)              | 1 (0.7)                 |
| <b>Cardiogenic event, No. (%)</b>               | 1 (1.8)            | 21 (15.4)               |
| <b>Myocardial Infarction, No. (%)</b>           | 1 (1.8)            | 2 (1.5)                 |
| <b>Cardiac arrest, No. (%)</b>                  | 0 (0)              | 11 (8.1)                |
| <b>Hypertensive crisis, No. (%)</b>             | 0 (0)              | 6 (4.4)                 |
| <b>Arrhythmia, No. (%)</b>                      | 0 (0)              | 1 (0.7)                 |
| <b>Pulmonary embolism, No. (%)</b>              | 0 (0)              | 1 (0.7)                 |
| <b>Respiratory failure, No. (%)</b>             | 32 (57.1)          | 59 (43.4)               |
| <b>Interstitial lung disease, No. (%)</b>       | 10 (17.9)          | 0 (0)                   |
| <b>Diffuse alveolar hemorrhage, No. (%)</b>     | 10 (17.9)          | 0 (0)                   |
| <b>Pneumonitis, No. (%)</b>                     | 12 (21.4)          | 0 (0)                   |
| <b>Pneumonia, No. (%)</b>                       | 0 (0)              | 38 (27.9)               |
| <b>Pulmonary oedema, No. (%)</b>                | 0 (0)              | 9 (6.6)                 |
| <b>COPD exacerbation, No. (%)</b>               | 0 (0)              | 8 (5.6)                 |
| <b>Pleural effusion, No. (%)</b>                | 0 (0)              | 3 (2.2)                 |
| <b>Pulmonary arterial hypertension, No. (%)</b> | 0 (0)              | 1 (0.7)                 |
| <b>Neurologic failure, No. (%)</b>              | 5 (8.9)            | 15 (11.0)               |
| <b>Epilepsy, No. (%)</b>                        | 3 (5.4)            | 6 (4.4)                 |
| <b>Coma, No. (%)</b>                            | 0 (0)              | 6 (4.4)                 |
| <b>Meningitis, No. (%)</b>                      | 0 (0)              | 2 (1.5)                 |
| <b>Stroke, No. (%)</b>                          | 1 (1.8)            | 1 (0.7)                 |
| <b>Cerebral hemorrhage, No. (%)</b>             | 1 (1.8)            | 0 (0)                   |
| <b>Urgent surgery/intervention, No. (%)</b>     | 5 (8.9)            | 2 (1.5)                 |
| <b>Cardiac surgery, No. (%)</b>                 | 3 (5.4)            | 0 (0)                   |
| <b>Bowl surgery, No. (%)</b>                    | 2 (3.6)            | 0 (0)                   |
| <b>Endovascular intervention, No. (%)</b>       | 0 (0)              | 2 (1.5)                 |
| <b>Other, No. (%)</b>                           | 4 (7.1)            | 2 (1.5)                 |
| <b>Acute kidney failure, No. (%)</b>            | 4 (7.1)            | 1 (0.7)                 |
| <b>Acute liver failure, No. (%)</b>             | 0 (0)              | 1 (0.7)                 |

Abbreviations: No., number of patients; %, percent

**Supplemental Table 2: Immunosuppressive/immunomodulatory therapies during the ICU Stay**

| Variable                                  | Years 2012-2020 | Years 2012-2016 | Years 2017-2020 | p=           |
|-------------------------------------------|-----------------|-----------------|-----------------|--------------|
| <b>Number of Patients, No. (%)</b>        | 192 (100)       | 95 (49.5)       | 97 (50.5)       |              |
| <b>SRD-related, No. (%)</b>               | 56 (29.2)       | 26 (27.4)       | 30 (30.9)       | 0.636        |
| <b>Co-existent SRD, No. (%)</b>           | 136 (70.8)      | 69 (72.6)       | 67 (69.1)       | 0.636        |
| <b>Immune therapy during ICU, No. (%)</b> | 68 (35.4)       | 36 (37.9)       | 32 (33.0)       | 0.547        |
| <b>Biological, No. (%)</b>                | 17 (8.9)        | 7 (7.4)         | 10 (10.3)       | 0.613        |
| <b>Immunosuppression, No. (%)</b>         | 31 (16.1)       | 21 (22.1)       | 10 (10.3)       | <b>0.031</b> |
| <b>Cytotoxic agents, No. (%)</b>          | 23 (12.0)       | 11 (11.6)       | 12 (12.4)       | >0.999       |
| <b>Immunoglobulins, No. (%)</b>           | 23 (12.0)       | 9 (9.5)         | 14 (14.4)       | 0.375        |
| <b>&gt;1 therapy, No. (%)</b>             | 33 (17.2)       | 16 (16.8)       | 17 (17.5)       | >0.999       |
| <b>ICU survival, No. (%)</b>              | 153 (79.7)      | 79 (83.2)       | 74 (76.3)       | 0.283        |

Abbreviations: No., number of patients; %, percent; ICU, intensive care unit; SRD, systemic rheumatic disease

**Supplemental Table 3: Comparison of SRD patients and a general ICU Population**

| Variable                           | SRD Patients (n=192) | Gen. ICU Population (n=1808) | p=               |
|------------------------------------|----------------------|------------------------------|------------------|
| Age (years), median (IQR)          | 61 (45-71)           | 62 (49-72)                   | <b>0.040</b>     |
| Female sex (%)                     | 120 (62.5)           | 667 (36.9)                   | 0.325            |
| SOFA, median (IQR)                 | 9 (6-11)             | 10 (7-12)                    | <b>0.008</b>     |
| SAPSII, median (IQR)               | 45 (35-55)           | 47 (36-58)*                  | 0.541            |
| <b>Reason for ICU admission</b>    |                      |                              |                  |
| Shock, No. (%)                     | 46 (24.0)            | 444 (24.6)                   | 0.930            |
| Cardiogenic event, No. (%)         | 22 (11.5)            | 559 (30.9)                   | <b>&lt;0.001</b> |
| Respiratory failure, No. (%)       | 91 (47.4)*           | 392 (21.7)                   | <b>&lt;0.001</b> |
| Neurologic failure, No. (%)        | 20 (10.4)            | 153 (8.5)                    | 0.346            |
| Urgent surgery, No. (%)            | 7 (3.6)              | 59 (3.3)                     | 0.675            |
| Other, No. (%)                     | 5 (2.6)              | 201 (11.1)                   | <b>&lt;0.001</b> |
| <b>Origin of patients</b>          |                      |                              |                  |
| Rheumatology ward                  | 39 (20.3)            | 15 (0.8)                     | <b>&lt;0.001</b> |
| Normal ward                        | 87 (45.3)            | 1446 (80.0)                  | <b>&lt;0.001</b> |
| ICU/emergency room                 | 66 (34.4)            | 347 (19.2)                   | <b>&lt;0.001</b> |
| MIV, No. (%)                       | 116 (60.4)           | 1233 (68.2)                  | 0.035            |
| Length of MIV (days), median (IQR) | 10 (4-22)            | 3 (0-10)                     | <b>0.014</b>     |
| NIV only, No. (%)                  | 46 (24.0)            | 139 (7.7)                    | <b>&lt;0.001</b> |
| RRT, No. (%)                       | 81 (42.2)            | 367 (20.3)                   | <b>&lt;0.001</b> |
| ECMO, No. (%)                      | 16 (8.4)             | 97 (5.3)                     | 0.099            |
| ECMO survival, No. (%)             | 8 (50.0)             | 28 (28.9)                    | 0.090            |
| ICU LOS (days), median (IQR)       | 10 (4-18.9)          | 7 (3-15)                     | <b>0.006</b>     |
| ICU survival, No. (%)              | 153 (79.7)           | 1266 (70.0)                  | <b>0.004</b>     |

Abbreviations: No., number of patients; %, percent; IQR, interquartile range; SOFA, Sequential Organ Failure Assessment Score; SAPSII, Simplified Acute Physiology Score II; SRD, systemic rheumatic disease; ICU, intensive care unit; MIV, mechanical invasive ventilation; NIV, non-invasive ventilation; thp., therapy; RRT, renal replacement therapy; ECMO, extracorporeal membrane oxygenation; LOS, length of stay.

\*Values available from 1568 patient

## Supplemental Figures

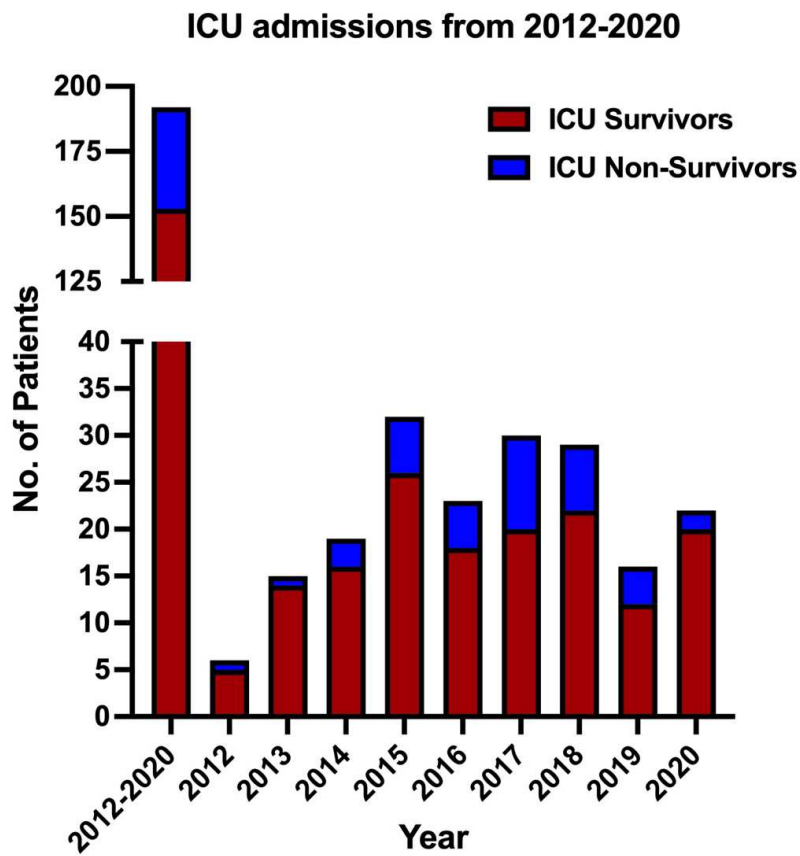

Schneeweiss-Gleixner et al. Supplemental Figures 1: Number of ICU admissions and outcomes per year.
